1            Ultra-sensitive Protein-SIP to quantify activity and  
2            substrate uptake in microbiomes with stable  
3            isotopes

4  
5    **Authors:**

6    Manuel Kleiner<sup>1#</sup>, Angela Kouris<sup>2</sup>, Marlene Jensen<sup>1</sup>, Yihua Liu<sup>2</sup>, Janine McC Calder<sup>2</sup>, and Marc  
7    Strous<sup>2#</sup>

8  
9  
10    <sup>1</sup>Department of Plant and Microbial Biology, North Carolina State University, Raleigh, North  
11    Carolina, USA

12    <sup>2</sup>Department of Geoscience, University of Calgary, Calgary, Alberta, Canada

13  
14    **#corresponding authors**

15    Manuel Kleiner: manuel\_kleiner (AT) ncsu.edu

16    Marc Strous: mstrous (AT) ucalgary.ca

## 21 Abstract

22 Stable isotope probing (SIP) approaches are a critical tool in microbiome research to determine  
23 associations between species and substrates. The application of these approaches ranges from  
24 studying microbial communities important for global biogeochemical cycling to host-microbiota  
25 interactions in the intestinal tract. Current SIP approaches, such as DNA-SIP or nanoSIMS, are  
26 limited in terms of sensitivity, resolution or throughput. Here we present an ultra-sensitive, high-  
27 throughput protein-based stable isotope probing approach (Protein-SIP). It allows for the  
28 determination of isotope incorporation into microbiome members with species level resolution  
29 using standard metaproteomics LC-MS/MS measurements. The analysis has been implemented  
30 as an open-source application (<https://sourceforge.net/projects/calisp/>). We demonstrate  
31 sensitivity, precision and accuracy using bacterial cultures and mock communities with different  
32 labeling schemes. Finally, we measure translational activity using heavy water labeling in a 63-  
33 species community derived from human fecal samples grown on media simulating two different  
34 diets. Activity could be quantified on average for 27 species per sample, with 9 species showing  
35 significantly higher activity on a high protein diet, as compared to a high fiber diet. Surprisingly,  
36 among the species with increased activity on high protein were several *Bacteroides* species  
37 known as fiber consumers. Apparently, protein supply is a critical consideration when assessing  
38 growth of intestinal microbes on fiber, including fiber based prebiotics. In summary, we  
39 demonstrate that our Protein-SIP approach allows for the ultra-sensitive (0.01% to 10% label)  
40 detection of stable isotopes of elements found in proteins, using standard metaproteomics data.

41

## 42 Introduction

43 Microbial communities drive chemical transformations from global element cycling to human  
44 nutrition. Unfortunately, the overwhelming complexity of these communities is often a barrier to  
45 unraveling their functionality. Use of isotopic or chemical labeling is a powerful solution to that  
46 problem. Even in the context of complex microbial communities, labeling enables assigning  
47 activities and functions to taxa, tracking metabolic pathways and resolving trophic relationships  
48 among species<sup>[1-5]</sup>. Current labeling approaches include use of click-chemistry (BONCAT)<sup>[6]</sup>,  
49 nanoscale secondary ion mass spectrometry (nanoSIMS)<sup>[2]</sup>, Raman microscopy<sup>[7]</sup>, genomic  
50 sequencing of isotope labeled DNA/RNA (DNA/RNA-SIP)<sup>[8]</sup>, separated from unlabeled  
51 DNA/RNA with density gradient centrifugation, and protein-based stable isotope probing  
52 metaproteomics (Protein-SIP)<sup>[9]</sup>. Some of these approaches use labels with defined chemistry  
53 such as non-canonical amino acids in BONCAT<sup>[6]</sup>, which are directly assimilated into biomass.  
54 Others use more generic labels, such as substrate molecules labeled with heavy isotopes of  
55 carbon, nitrogen, oxygen and hydrogen<sup>[2,7,10,11]</sup>. When spatial organization of samples is  
56 important, approaches are available to image labeling outcomes<sup>[12,13]</sup>. When it is unknown in  
57 advance which species or pathway might be involved in a target process, labeling can be  
58 combined with untargeted metagenomics and metaproteomics analyses.

59         Recently, we developed an algorithm (Calis-p 1.0) to estimate natural isotope abundances  
60 (stable isotope fingerprints, SIF) of carbon isotopes of individual species within complex  
61 microbial communities using metaproteomics<sup>[14]</sup>. In nature, <sup>13</sup>C and <sup>12</sup>C occur side by side at a  
62 ratio of approximately 0.011 <sup>13</sup>C/<sup>12</sup>C. For microbial biomass, very subtle changes to this ratio, as  
63 little as 0.0001, already provide information about carbon assimilation pathways and carbon  
64 sources used. Our algorithm, which modeled mass spectra of individual peptides using Fast  
65 Fourier Transformations (FFTs), was able to detect these subtle changes. In the present paper we  
66 further develop this extremely sensitive approach to also work for stable isotope probing (SIP)  
67 experiments. This enables us to detect and quantify the assimilation of heavy isotopes by  
68 individual species in complex microbial communities using metaproteomics (Protein-SIP).

69         Protein-SIP differs from other metabolic labeling approaches in that the heavy isotopes  
70 from the substrate are incorporated into protein through *de novo* synthesis of amino acids from  
71 the substrates via biosynthetic pathways, rather than directly in the form of labeled amino acids.  
72 Such labeled amino acids are used, for example, in the “Stable Isotope Labeling by Amino Acids  
73 in Cell Culture” (SILAC) approach<sup>[15]</sup>. The “random” incorporation of label into various amino  
74 acids and ultimately into peptides makes data analysis much more complicated in Protein-SIP, at  
75 least compared to the predictable exact mass shifts resulting from direct assimilation of labeled  
76 amino acids in SILAC.

77         Protein-SIP approaches have been successfully developed before, but these approaches  
78 have their challenges (for an overview see introduction of<sup>[10]</sup>). Metaproteomics relies on high-  
79 resolution mass spectrometry to detect, identify and quantify peptides, which are then used for  
80 protein identification and quantification<sup>[16]</sup>. Using the same mass spectra already used for peptide

81 identification to also quantify abundances of heavy isotopes in these peptides appears a  
82 straightforward add-on, as these spectra resolve the peptide isotopes and provide their intensities.  
83 However, unknown amounts of heavy isotopes shift peptide mass peaks by unknown numbers of  
84 mass-units, which makes the identification of peptides based on masses computationally  
85 challenging. The existing Sipros algorithm solved this problem with brute force by coupling the  
86 detection of labeled peptides with the initial peptide identification. Sipros predicts the most  
87 abundant peptide masses and isotopic distributions of b and y ions in an isotope atom% range of  
88 0 - 100% in 1% increments<sup>[17]</sup>. This approach makes Protein-SIP experiments computationally so  
89 expensive that dedicated smaller protein sequence databases have to be constructed for  
90 determination of stable isotope content of peptides<sup>[18]</sup> and even then the approach still requires a  
91 supercomputer to work. For example, one study using the Sipros approach had to invest around  
92 500,000 CPU hours for a study with less than 10 labeled samples<sup>[10]</sup>. The MetaProSIP algorithm  
93 overcame the problem by using spectra of unlabeled peptides as a starting point for  
94 computations. These unlabeled peptides can be derived from the SIP experiment itself if a  
95 portion of the original unlabeled proteins is still present, or, alternatively, from a control sample  
96 that was incubated without label. MetaProSIP then detects the labeled peptides corresponding to  
97 the unlabeled peptides and computes the relative isotope abundance and labeling ration based on  
98 the comparison of the labeled and unlabeled form of peptides<sup>[19]</sup>. Because MetaProSIP requires  
99 a labeled peptide's spectrum to be shifted away from the mono-isotopic mass, it requires  
100 relatively heavy labeling (e.g. >20.24 atom% for <sup>13</sup>C and >73.1 atom% for <sup>15</sup>N<sup>[20]</sup>).

101 While the identification challenges can be solved by clever algorithms, underneath these  
102 challenges hides a more fundamental problem. Figure 1 shows the expected mass spectra of three  
103 *E. coli* peptides after 1/8 generation of labeling with <sup>13</sup>C-glucose. The figure illustrates the  
104 fundamental problem with these data: Assimilation of heavy isotopes into peptides leads to  
105 broadening of spectra. Thus, a peptide's matter gets divided over ever more peaks, reducing  
106 sensitivity. Also, because many peptides get injected into the mass spectrometer simultaneously,  
107 especially for complex samples such as a microbial community, the probability of peptide's  
108 spectrum overlapping with another spectrum increases as it broadens, reducing data quality.  
109 Heavy peptides are especially sensitive to these issues. Counter-intuitively, for Protein-SIP,  
110 sensitivity is highest when using small amounts of label.



111

112 **Figure 1:** Modeled spectra of three *E. coli* peptides after  $\frac{1}{8}$  generations of growth on 1% (left) and 10%  
113 (right)  $^{13}\text{C}_{1-6}$  glucose ( $^{13}\text{C}/^{12}\text{C}$  0.02 and 0.11 respectively). Assimilation of  $^{13}\text{C}$  into peptides leads to a  
114 shift of matter away from the monoisotopic mass (shown as \*). The resulting peak intensity changes  
115 are shown in red - for peaks with decreased intensity -, and blue - for peaks with increased intensity after  
116 labeling. Dashed lines show experimentally determined average detection limits for peaks (see methods).  
117 Peaks below the dashed line are not recorded by the mass spectrometer. Percentages above lines  
118 indicate how much of the actual change is detectable in practice. Peptide 1 - IGLETAR; peptide 2 -  
119 AFEMGWRPMSGVK; peptide 3 - QIQEALQYANQAQVTKPQIQQTGEDITQDTLFLLGSEALESMIK.

120 Our previous algorithm was developed to estimate slight differences in isotopic content  
121 based on peptide mass spectra, to determine natural carbon isotope abundances<sup>[14]</sup>. It made use of  
122 the fact that in nature, heavy isotopes are distributed randomly, yielding spectra that are perfect  
123 Poisson distributions. This enabled us to reduce the noisiness of the data by identification and  
124 rejection of imperfect spectra. Spectra in Protein-SIP experiments do not have such conveniently  
125 predictable properties. For analysis of these data we therefore developed rigorous noise filtering  
126 and estimated isotopic content based on neutron abundance, requiring no assumptions about a  
127 spectrum's properties.

128 We present new algorithms and software for sensitive and quantitative estimation of  
129 isotopic content of individual species in stable isotope probing experiments with complex  
130 microbial communities. The new algorithms have been integrated into the Calis-p software  
131 together with the SIF algorithms, and the software was completely re-written to enable Protein-  
132 SIP (new version is Calis-p 2.0). The software decouples peptide identification from label  
133 detection and is thus compatible with most standard peptide identification pipelines.

134 Computation of label content is very fast, a high-end desktop computer only needs one minute  
135 for processing ~1Gb of data, corresponding to ~10,000 MS1 spectra. ~40 min of Orbitrap  
136 runtime. Using pure cultures of bacteria and mock communities, we show that Protein-SIP yields  
137 best results when substrates are only partially labelled. For example, for carbon the fraction of  
138 heavy atoms should make up <10% of the total. For abundant organisms, assimilation of label  
139 (such as  $^{13}\text{C}$ ) into protein can be quantified within minutes after adding the label, within 1/16 of a  
140 generation. Even for rare organisms making up ~1% of a community, a single generation of  
141 labeling is sufficient for robust detection of label assimilation. We believe these advances will be  
142 helpful to microbiome researchers and microbial ecologists seeking to assign functions and  
143 activities to taxa, to track metabolic pathways and for resolving trophic relationships among  
144 species.

## 145 Results

146 Previously we presented algorithms and software for estimating natural isotope fingerprints from  
147 peptide mass spectra<sup>[14]</sup>. Our previous algorithm made use of the stochastic distribution of  
148 isotopes in nature and mass spectra that can be modelled by Fast Fourier Transformations.  
149 Quality control is intrinsic to that approach, as poor quality spectra cannot be modelled with FFT  
150 and can be rejected. Examples of low quality spectra are spectra that overlap with other spectra  
151 or low intensity spectra that are affected by noise. Feeding microbes labeled substrates for  
152 Protein-SIP experiments leads to peptide mass spectra with irregular shapes that cannot be  
153 modelled with FFT (Fig. 1). Isotopic composition of such spectra can still be inferred, by adding  
154 up the mass intensities of all peaks in the spectrum according to Equation 1 in the Methods  
155 (implemented as “neutron abundance” model in Calis-p). Unfortunately, that approach does not  
156 enable rejection of low quality spectra. Therefore, we implemented a simple noise filter based on  
157 unsupervised clustering of all spectra associated with a single peptide using graph theory (see  
158 Materials and Methods for details). The assumption underlying this approach is that most spectra  
159 are relatively unaffected by noise and will form the largest cluster. Spectra outside the largest  
160 cluster should be rejected for being of lower quality.

161 The performance of this filter was benchmarked using previous natural-isotope abundance data  
162 of pure cultures and mock communities of microbes (Suppl. Results & Discussion, Fig. S1,  
163 Tables S1 & S2). The FFT estimates of  $^{13}\text{C}/^{12}\text{C}$  ratios for filtered spectra was as good or better  
164 than reported previously without filtering<sup>[14]</sup>. Even better, after filtering the estimates of  $^{13}\text{C}/^{12}\text{C}$   
165 ratios according to Equation 1 (see Materials and Methods) were now almost as good as for FFT.  
166 The average difference between the actual and estimated median  $\delta^{13}\text{C}$  values for the fifteen most  
167 abundant organisms of a mock community was 2‰ for FFT and 4‰ for the neutron abundance  
168 model. Implementation of the filter also dramatically reduced computation times because fewer  
169 FFT operations were needed.

170 To test the performance of Equation 1 for  $^{13}\text{C}$  labeled peptides, we labeled cells of two  
171 model organisms, *Escherichia coli* K12 and *Bacillus subtilis* ATCC 6051, to saturation, with  $^{13}\text{C}$   
172 glucose. Three replicate cultures were grown overnight with fully-labeled glucose ( $^{13}\text{C}_{1-6}$ ) and  
173 single-labeled glucose ( $^{13}\text{C}_2$ ), with the percentage of spiked-in  $^{13}\text{C}$  increasing from 0 and 10% of  
174 total glucose in seven steps. The glucose that was used as unlabeled glucose had the natural  $^{13}\text{C}$   
175 content of around 1.1%. Protein was extracted, peptides were prepared, subjected to LC-MS/MS,  
176 and identified with SEQUEST HT in Proteome Discoverer and results analyzed in Calis-p (see  
177 Materials and Methods).

178 Surprisingly, already adding as little as 1% label could severely compromise the identification of  
179 peptides by search algorithms such as SEQUEST. For example, for *B. subtilis* average peptide-  
180 spectrum matches (PSMs) dropped by almost 90% at 10% added label. To mitigate these losses,  
181 we tested five potential improvements to search strategies (see Materials and Methods and  
182 Supplementary Results & Discussion for details). These ranged from computationally costly,  
183 open mass window searches to more confined, faster approaches. All strategies improved  
184 identification outcomes (Fig. 2 & S2). However, for the “open search” and “dynamic  
185 modifications” strategy, computation times became impractical. For example, basic peptide  
186 identification on a high performance desktop computer with the SEQUEST algorithm for single  
187 140 min LC-MS/MS file from a microbial community took 17 min to search with our standard  
188 search parameters, while it took 72 min with a search strategy that included modifications of the  
189 peptide termini, and 1,947 min for a search strategy with a open (20 Da) mass window. We  
190 selected the Modifications of Termini (N=low, C=high) strategy as a practical compromise  
191 between peptides identified and extra computation time needed. This strategy adds six custom  
192 “post-translational” modifications to the protein identification search. These modifications  
193 generated more PSMs by enabling addition of one to three neutron masses at the N-terminus of a  
194 peptide and four to six neutron masses to its C-terminus.

a) *Bacillus subtilis* ATCC 6051



b) *Escherichia coli* K12



195

196 **Figure 2: A small modification of the peptide identification approach drastically increases the**  
197 **number of peptides with 1-10% label that can be identified.** Number of peptide spectral matches  
198 (PSMs) identified at different  $^{13}\text{C}$  label percentages using six different peptide identification strategies.  
199 Cultures of a) *B. subtilis* and b) *E. coli* were grown in Bacillus minimal medium or M9 minimal medium (*E.*  
200 *coli*) in which a percentage of the glucose was replaced with  $^{13}\text{C}_{1-6}$  glucose for >10 generations to achieve  
201 close to complete labeling. Peptides were identified using the SEQUEST HT Node in Proteome  
202 Discoverer (version 2.2.) with six different strategies to account for the mass shifts caused by addition of  
203 heavy atoms. Standard search: no dynamic modifications to account for addition of label; Open search:  
204 the precursor mass tolerance was set to 20 Da allowing for the potential addition of 20 neutrons (e.g.  $^{13}\text{C}$   
205 atoms) in a peptide; Dynamic modifications: allowing for up to three dynamic modifications each of two  
206 custom peptide modifications adding a 1 neutron mass shift and a 2 neutron mass shift (up to 9 neutrons  
207 in total per peptide); Modifications on termini: six dynamic modifications were set up that were restricted  
208 to either the C or the N-terminus of the peptide. The modifications account for mass shifts of 1 to 6  
209 neutrons and depending on the search strategy the low mass shifts (1, 2 and 3 neutrons) were set up as  
210 modifications on the C or the N-Terminus or low and high mass shift modifications were distributed  
211 between both termini. Each modification can only be added to a terminus once. This strategy allows for a  
212 total of 21 neutron additions to a peptide.

213 After assigning peptides to spectra with the improved peptide identification strategy, low  
214 quality spectra were rejected using the filter described above. For the remaining spectra, the  
215 number of neutron masses added as custom modifications during the identification step already  
216 provided a qualitative, or at best semi-quantitative, measure for label incorporation (Fig. 3,  
217 Suppl. Table S3). However, inference of the  $^{13}\text{C}/^{12}\text{C}$  ratios by Equation 1 was much more  
218 precise, even for minimally (0.01%) labeled cells. Precision and especially label recovery were  
219 both higher when using glucose labeled at only a single position rather than with fully labeled  
220 glucose. For the latter, the recovery was only 75-79%, meaning that the  $^{13}\text{C}/^{12}\text{C}$  ratio was 21-  
221 25% lower than expected. Potentially, this was caused by broadening of spectra with fully  
222 labeled glucose (Fig. 1). As explained in the introduction, broader spectra reduce sensitivity.  
223 Interestingly, the breadth of spectra could be used to infer to what degree  $^{13}\text{C}$  carbon was  
224 assimilated in clumps of multiple atoms (pie charts in Fig. 3). This approach, which only works  
225 when all atoms in a substrate are labeled and when cells are labeled to saturation, could be used  
226 to infer the number of carbon atoms in substrates that a given species is assimilating. In other  
227 words, Protein-SIP can provide hints on whether a species is autotrophic or heterotrophic, or  
228 whether it consumes sugars or fatty acids.



229

230 **Figure 3: The number of labeled atoms per substrate molecule impacts the ability to quantify label**  
 231 **incorporation accurately.** Labeling, to saturation, of *E. coli* and *B. subtilis* with single-labeled ( $^{13}\text{C}_2$ ) and  
 232 fully labeled ( $^{13}\text{C}_{1-6}$ ) glucose. The  $^{13}\text{C}/^{12}\text{C}$  ratio in the substrate was varied. Note that unlabeled glucose  
 233 (0% added  $^{13}\text{C}$  glucose) has a natural  $^{13}\text{C}$  content of around 1.1%. Median  $^{13}\text{C}/^{12}\text{C}$  ratios of peptides as  
 234 determined by the Equation 1 (orange circles) increased linearly with substrate  $^{13}\text{C}/^{12}\text{C}$  ratios ( $R^2 > 0.999$ ).  
 235 Almost 100% of the substrate  $^{13}\text{C}$  was recovered in protein for  $^{13}\text{C}_2$  glucose labeled cells. Recovery was  
 236 lower for  $^{13}\text{C}_{1-6}$  glucose. The proportion of neutron masses detected via the improved peptide  
 237 identification strategy using N- and C-terminal modifications (yellow circles) increased with substrate  
 238  $^{13}\text{C}/^{12}\text{C}$  ratios, but at low linearity and sensitivity. The number of Peptide Spectrum Matches (PSM)  
 239 decreased for  $^{13}\text{C}/^{12}\text{C}$  ratios above 2.5% (insets) as expected based on Figures 2 & S2. Assimilation of  
 240 carbon into amino acids in clumps of multiple  $^{13}\text{C}$  atoms was detectable in peptide spectra of cultures fed  
 241 with  $^{13}\text{C}_{1-6}$  glucose as shown in pie charts for experiments fed with  $^{13}\text{C}/^{12}\text{C}$  1% above natural background.  
 242 The detailed data for this figure can be found in Suppl. Table S3.

243           The data of Figure 3 are not yet a meaningful representation of what an actual Protein-  
244 SIP experiment would look like. In practice, we would always avoid labeling a microbial  
245 community to saturation, because all community members would end up being labeled equally,  
246 providing no new information on elemental fluxes and substrate uptake in the community. To  
247 mimic an actual Protein-SIP experiment, we mixed labeled and unlabeled cells of *E. coli* at  
248 different ratios, leading to compound spectra as shown in Figure 1.

249           The results indicated that estimation of  $^{13}\text{C}/^{12}\text{C}$  ratios with this type of compound spectra was  
250 more challenging (Fig. S3, Suppl. Table S4). Also, the difference between single labeled and  
251 fully labeled glucose was more pronounced, with the former yielding much better sensitivity and  
252 label recovery than the latter. We also compared the performance of two center statistics for  
253  $^{13}\text{C}/^{12}\text{C}$  ratios, the intensity-weighted mean and the median. The intensity-weighted mean  
254 displayed higher sensitivity and precision than the median in these experiments (for contrasting  
255 results for community samples see below). However, both with 1% and 10% single labeled  
256 glucose, even the median  $^{13}\text{C}/^{12}\text{C}$  ratios accurately quantified label assimilation within 1/16 of a  
257 generation (simulated by mixing of labeled and unlabeled cells), corresponding to as little as 1-2  
258 min of growth for *E. coli*.

259           Next, we investigated whether our approach was capable of detecting label assimilation  
260 in the context of a microbial community. For this, we used a previously described mock  
261 community, comprising >30 microbes, including gr+ and gr- bacteria, an archaeum, a eukaryote  
262 (algae) and several phages<sup>[21]</sup>. This community also included *E. coli* K12, at ~6% abundance.  
263 Here, we mixed cells of *E. coli* labeled with 1%, 5% and 10%  $^{13}\text{C}_{1-6}$ -glucose into the unlabeled  
264 mock community at a ratio corresponding to one generation of growth for *E. coli*. Quantification  
265 of  $^{13}\text{C}$  assimilation was straightforward and linear ( $R^2$  0.99, Fig. 4A, Suppl. Table S5). This was  
266 perhaps not surprising because a relatively large amount of label was used and the relative  
267 abundance of *E. coli* in the mock community was high, i.e. ~12% after addition of the labeled  
268 cells.



269

270 **Figure 4.** Detection of  $^{13}\text{C}$  assimilation by *E. coli* within a mock community of 32 microorganisms  
 271 developed by [21]. In each experiment, half of the *E. coli* cells were labeled using  $^{13}\text{C}_{1-6}$ -Glucose,  
 272 corresponding to one generation of labeling, with glucose containing 0, 1, 5, and 10%  $^{13}\text{C}$  on top of  
 273 natural abundance  $^{13}\text{C}$  (three replicate samples were generated for each labeling percentage and  
 274 measured separately). Label incorporation by *E. coli* (orange circles in a), but not by other organisms  
 275 (blue circles shown for five organisms in b-e), was clearly detectable and reproducible. Yellow box  
 276 plots show the measured  $^{13}\text{C}$  content of sets of *E. coli* peptides, obtained by downsampling of the results  
 277 in a, mimicking the spectral intensities of the peptides collected for each unlabeled organism in panels b-  
 278 e i.e. only *E. coli* peptides that corresponded in intensity to peptides of the analyzed organism were used.  
 279 The percentage in parentheses indicates the relative abundance of the organism in the mock community  
 280 based on its proteinaceous biomass and the “n=” indicates the average number of peptides passing the  
 281 filters in calis-p for SIP value calculation for the organism in each experiment, which also corresponds to  
 282 the number of *E. coli* peptides used in downsampling. These results show label incorporation can be  
 283 estimated, even for relatively rare species. Suppl. table S5 shows results for each species.

284 Figure 4 also shows to what extent the addition of the labeled cells of *E. coli* led to the  
 285 incorrect inference of label assimilation by five other members of the mock community. The  
 286 relative abundance of these unlabeled organisms was between 0.1% and 7%. The determined  
 287  $^{13}\text{C}/^{12}\text{C}$  ratios for the >20 other members of the mock community are reported in supplementary  
 288 table S5. We found that the choice of center statistic used has a major impact on the false

289 positive detection of label incorporation. When using the median center-statistic, the rate of False  
290 Positive Rate (FPR) label detection for populations with nine or more peptides (after filtering)  
291 was 3.4% and for populations with eight or fewer peptides it was 45%. In contrast, when using  
292 the weighted mean the FPR was 51% for populations with nine or more peptides and 50% for  
293 populations with eight or less peptides. In our dataset, the nine peptide threshold corresponded to  
294 ~1% relative abundance of strains/species within the mock community. We investigated massive  
295 differences in FPRs between the two center statistics by manually checking spectra causing false  
296 positives and found that low-intensity peptide spectra associated with less abundant populations  
297 were often affected by the overlap with broadened spectra of a labeled, more-abundant  
298 population. Therefore, we concluded that for label detection in microbial communities the  
299 median should be used (see detailed discussion in supplementary methods). Figure 4 shows  
300 examples of false-positive inferences for *Pseudomonas pseudoalkaligenes*.

301 To investigate whether label assimilation can be correctly inferred for less abundant  
302 populations, we downsampled (bootstrapped, up to ten times) the set of >6,000 peptides  
303 collected for *E. coli*, using the peptides of each other organism as templates. In the resulting  
304 datasets, each *E. coli* peptide was matched to a peptide of the other organism with a similar  
305 intensity. Based on inferences for these bootstrapped datasets shown in Figure 4, label  
306 assimilation could be robustly estimated, at least for populations associated with nine or more  
307 peptides, corresponding to ~1% abundance. This number of peptides is much smaller than the  
308 ~30 peptides needed for estimation of natural carbon isotope content in a species using Protein-  
309 SIF (Suppl. Results & Discussion, Fig. S1).

310 Next, we analyzed how well we could detect incorporation of label into individual  
311 proteins based on how many peptides passed the Calis-p quality filters for a protein. For this we  
312 analyzed the Calis-p reported  $^{13}\text{C}/^{12}\text{C}$  ratios for proteins from the mock communities with 5%  
313 labeled *E. coli* spiked-in and without spiked in *E. coli*.  $^{13}\text{C}/^{12}\text{C}$  ratios in *E. coli* proteins from the  
314 5% spike-in samples were on average much higher than the ratios for proteins from the unlabeled  
315 mock communities and the unlabeled mock community members in the 5% spike-in samples  
316 (Fig. 5a). Even for proteins for which only 1 peptide passed the Calis-p quality filters, this  
317 pattern was observed. This indicated that label incorporation into individual proteins can be  
318 detected with as few as 1 peptide. For some proteins from unlabeled organisms, for which 3 or  
319 less peptides passed the Calis-p quality filter,  $^{13}\text{C}/^{12}\text{C}$  ratios that were above the expected value  
320 of 0.011 (Fig. 5a), indicating that, as expected, the accuracy of the ratio estimates increases with  
321 more peptides available per protein.

322 To test if meaningful results can be obtained from populations in mixed communities that shift  
323 their metabolism and physiology we analyzed  $^{13}\text{C}/^{12}\text{C}$  ratios in *E. coli* proteins from the 5%  
324 spike-in samples in more detail. For this analysis it is important to know that the unlabeled *E.*  
325 *coli* cells that were part of the mock community were grown at well oxygenated conditions in a  
326 complex medium containing organic nutrients such as amino acids and vitamins (LB broth),

327 while the *E. coli* grown in the presence of  $^{13}\text{C}_{1-6}$ -glucose (5% of total glucose) were grown under  
328 oxygen limited conditions in a minimal medium (M9 broth) that contained glucose as the only  
329 carbon source and nitrogen only in inorganic form. This mixing of unlabeled LB grown and  
330 labeled M9 grown *E. coli* led to the following expectations: 1) proteins that are produced  
331 exclusively or almost exclusively by cells growing on LB would show no label incorporation in  
332 the 5% label mock communities and thus have  $^{13}\text{C}/^{12}\text{C}$  ratios close to the expected value of  
333 0.011; and 2) conversely proteins that are produced exclusively or almost exclusively by cells  
334 growing on M9 would show high label incorporation in the 5% label mock communities ( $^{13}\text{C}/^{12}\text{C}$   
335 ratios of  $>0.04$ ). We only looked at proteins that were detected in at least two replicates of one  
336 condition (Suppl. Table S6, Fig. 5b). Proteins for the degradation of amino acids and other  
337 carbon sources were unlabeled, indicating that they were only produced by *E. coli* in complex  
338 medium, but not when growing on M9. Proteins for amino acid biosynthesis pathways,  
339 glycolysis, mixed acid fermentation and iron acquisition were heavily labeled, indicating that  
340 lack of amino acid sources in the medium led to expression of biosynthesis pathways, oxygen  
341 limitation led to induction of fermentation pathways and that potentially cells growing in M9  
342 were iron limited.

343

344

**a) Detection of  $^{13}\text{C}$  label in individual *E. coli* proteins of *E. coli* in a mock community**



**b) Examples of proteins from *E. coli* grown under different conditions with and without label and spiked into mock community**

| 0%    | 5%    | Accession | Annotation | General Pathway               |
|-------|-------|-----------|------------|-------------------------------|
| 0.010 | ND    | P00805    | AnsB       | Amino Acid Degradation        |
| 0.011 | ND    | P0A6T9    | GcvH       | Amino Acid Degradation        |
| 0.010 | 0.010 | P0A853    | TnaA       | Amino Acid Degradation        |
| 0.010 | 0.011 | P0AC38    | AspA       | Amino Acid Degradation        |
| 0.010 | 0.011 | P0A6F3    | GlpK       | Glycerol Degradation          |
| 0.011 | 0.011 | P69910    | GadB       | Amino Acid Degradation        |
| 0.012 | 0.012 | P0AB77    | Kbl        | Amino Acid Degradation        |
| 0.010 | 0.013 | P12758    | Udp        | Ribonucleoside degradation    |
| 0.011 | 0.013 | P02925    | RbsB       | Ribose uptake                 |
| 0.010 | 0.045 | P0A6P9    | Eno        | Glycolysis                    |
| 0.011 | 0.046 | P0ADG7    | GuaB       | Ribonucleotide biosynthesis   |
| 0.011 | 0.046 | P08839    | PtsI       | Sugar uptake (likely glucose) |
| 0.010 | 0.047 | P0AD61    | PykF       | Mixed Acid Fermentation       |
| 0.010 | 0.047 | P06959    | AceF       | Glycolysis                    |
| 0.011 | 0.049 | P62707    | GpmA       | Glycolysis                    |
| 0.011 | 0.051 | P61889    | Mdh        | TCA, Mixed Acid Fermentation  |
| 0.011 | 0.051 | P0ABK5    | CysK       | Amino Acid Biosynthesis       |
| ND    | 0.045 | P0A817    | MetK       | Amino Acid Biosynthesis       |
| ND    | 0.045 | P09832    | Gltd       | Amino Acid Biosynthesis       |
| ND    | 0.046 | P0AB80    | IlvE       | Amino Acid Biosynthesis       |
| ND    | 0.047 | P23721    | SerC       | Amino Acid Biosynthesis       |
| ND    | 0.047 | P0A877    | TrpA       | Amino Acid Biosynthesis       |
| ND    | 0.047 | P00864    | Ppc        | Mixed Acid Fermentation       |
| ND    | 0.047 | P11454    | EntF       | Iron Acquisition              |
| ND    | 0.048 | P06987    | HisB       | Amino Acid Biosynthesis       |
| ND    | 0.050 | P00561    | ThrA       | Amino Acid Biosynthesis       |
| ND    | 0.050 | P0AEL6    | FepB       | Iron Acquisition              |
| ND    | 0.051 | P0ADI4    | EntB       | Iron Acquisition              |
| ND    | 0.052 | P0AB24    | EfeO       | Iron Acquisition              |
| ND    | 0.053 | P05825    | FepA       | Iron Acquisition              |

346 **Figure 5: Measurement of  $^{13}\text{C}$  label content in individual proteins.** Analysis of a subset of the data  
347 shown in Fig. 4. *E. coli* grown in standard LB medium without label (0% added label) was part of a mock  
348 community consisting of 32 microorganisms [21]. To this mock community *E. coli* grown in minimal M9  
349 medium with glucose (5% of total glucose as  $^{13}\text{C}_{1-6}$ -Glucose) in air tight bottles under oxygen limiting  
350 conditions was added in a 1:1 ratio to the unlabeled LB grown *E. coli* cells in the mock community. **a)**  
351 Detection of increased  $^{13}\text{C}/^{12}\text{C}$  ratios in individual proteins as a function of the total number of different  
352 peptides detected for each protein. Proteins from all species in the unlabeled mock community are  
353 compared to the proteins of all unlabeled species in the mock community that contained the 5% labeled  
354 *E. coli* cells, as well as to the proteins from *E. coli* in the mock community that contained the labeled *E.*  
355 *coli* cells. The boxes indicate the 25th and 75th percentile, the line the median, the whiskers the 10th and  
356 90th percentile, and the dots the 5th and 95th percentile. **b)** Examples of *E. coli* proteins that showed no  
357 or high label incorporation in 5%  $^{13}\text{C}$  glucose grown *E. coli* in the mock community. Unchanged  $^{13}\text{C}/^{12}\text{C}$   
358 ratios shown in the table between treatments indicate that proteins were not produced in cells that were  
359 grown in M9 medium with labeled glucose, but were present in cells grown in LB. Proteins with high ratio  
360 were mostly or exclusively produced by cells grown in M9.  $^{13}\text{C}/^{12}\text{C}$  ratios in the table are averages of three  
361 replicate samples. Only proteins that were detected in at least two replicates in one of the conditions are  
362 shown. The full table is Suppl. Table S6.

### 363 **Case Study: Differential heavy water incorporation reveals activity changes** 364 **for intestinal microbiota species in response to dietary changes**

365 To demonstrate the power of the Calis-p approach and to test our approach for additional  
366 elements we analyzed data from a complex microbial community grown with two types of heavy  
367 water<sup>[11]</sup>. The community consisted of 63 species isolated from human fecal material and was  
368 grown in bioreactors with either a high fiber medium or a high protein medium to simulate  
369 different dietary conditions encountered by the intestinal microbiota. For each diet treatment  
370 three replicate cultures were grown for 12 hours with unlabeled water and water in which 25%  
371 were either replaced with  $^2\text{H}_2\text{O}$  or  $\text{H}_2^{18}\text{O}$ . Both  $^2\text{H}$  and  $^{18}\text{O}$  can function as markers of  
372 translational activity<sup>[10,22]</sup>.

373 We obtained thousands of peptides passing Calis-p quality filtering for each sample and  
374 we were able to quantify heavy water incorporation (>9 peptides passing Calis-p filters for  
375 species) for 21 to 30 species per sample (Mean = 27, Median = 28). We found that overall  
376 incorporation of  $^{18}\text{O}$  was much higher than incorporation of  $^2\text{H}$  (Fig. S4). The low incorporation  
377 of  $^2\text{H}$  can likely be attributed to the known strong fractionation of hydrogen isotopes in  
378 organisms<sup>[23]</sup>, the fact that many hydrogen atoms on peptides can freely exchange with water  
379 leading to loss of label during sample preparation<sup>[24]</sup>, as well as the known toxicity of deuterium  
380 to many organisms preventing its incorporation<sup>[22,25]</sup>. An additional factor that favors  
381 incorporation of  $^{18}\text{O}$  over  $^2\text{H}$  is that for incorporation of  $^{18}\text{O}$  into non-exchangeable positions  
382 amino acid *de novo* synthesis is not required.  $^{18}\text{O}$  can be incorporated into the carboxyl group of  
383 amino acids during proteolytic cleavage of substrate proteins<sup>[26]</sup> and remain in the peptide bond  
384 upon formation of new peptide bonds. While  $^{18}\text{O}$  in peptide bonds is stable and does not freely  
385 exchange with water,  $^2\text{H}$  in many positions on the peptide readily exchanges with H from  
386 water<sup>[24]</sup>. For hydrogen to be in positions with low exchangeability amino acid *de novo* synthesis  
387 is required, because the necessary carbon-hydrogen bonds are only generated then<sup>[24]</sup>.

388 On the whole community level, label incorporation was significantly higher in  
 389 communities grown with high protein as compared to high fiber (Fig. S4). On the level of single  
 390 species we observed that responses to a change in “diet” were species-specific with some species  
 391 such as *Akkermansia muciniphila*, *Bacteroides ovatus*, and *Clostridium bolteae* incorporating  
 392 significantly more label under high protein conditions, while other species, such as *Alistipes*  
 393 *onderdonkii*, *Clostridium lavalense*, and *Flavonifractor plautii*, showed no change or non-  
 394 significant trends towards higher incorporation under high fiber conditions (Fig. 6). While  
 395 incorporation trends for species between  $^2\text{H}$  and  $^{18}\text{O}$  were mostly consistent with each other,  
 396 much fewer comparisons tested significant for  $^2\text{H}$  (4 for  $^2\text{H}$  versus 9 for  $^{18}\text{O}$ ) likely due to the  
 397 overall low incorporation of  $^2\text{H}$  and resulting low sensitivity. Our results indicate that availability  
 398 of higher amounts of protein increases the translational activity of many intestinal microbiota  
 399 species, which is in line with previous studies showing nitrogen, and by extension protein, is the  
 400 limiting nutrient for the intestinal microbiota<sup>[27,28]</sup>. Surprisingly, although typically described as  
 401 fiber degrading specialists<sup>[29–31]</sup>, we saw a significant increase of activity in several *Bacteroides*  
 402 species in the high-protein medium relative to the high-fiber medium. This shows that it is  
 403 critical to assess nitrogen/protein supply when analyzing fiber dependent growth of intestinal  
 404 microbes. Furthermore, it suggests that nitrogen/protein supply is critical to consider when  
 405 developing fiber based prebiotics to manipulate intestinal microbiota species<sup>[32,33]</sup>, which to our  
 406 knowledge has not been considered so far.

407



408

409 **Figure 6: Strong differences in heavy water incorporation in intestinal microbiota species in**  
 410 **response to diet.** 63 species isolated from human intestinal microbiota were grown together in triplicates

411 in either a high fiber or high protein medium in the presence of unlabeled water or water with either 25%  
412  $^2\text{H}$  or  $^{18}\text{O}$ <sup>[11]</sup>. Calis-p based stable isotope ratios are shown for the 20 species for which at least 9 peptides  
413 passed Calis-p filtering conditions in all replicates. Each box shows the data for all peptides of the  
414 triplicate cultures combined (27 to 2225 peptides per box). The red lines indicate the average median for  
415 each species in the control samples with unlabeled water. Statistically significant differences are indicated  
416 with “\*” based on Student’s t-test on the means of replicates at  $p < 0.05$ .

## 417 **BOX: Summary of Practical Workflow Considerations**

418 The Protein-SIP workflow consists of several steps including (1) incubation of a  
419 microbial community with a isotopically labeled substrate, (2) metaproteomic sample  
420 preparation and LC-MS/MS data acquisition, (3) peptide identification, (4) data conversion and  
421 input to Calis-p, (5) isotope pattern extraction and computation of isotope content in Calis-p, and  
422 (6) analysis and interpretation of data provided by Calis-p (Fig. 7). The provision of isotopically  
423 labeled substrates in experiments can take many forms, such as addition of substrate to  
424 incubations of enrichment cultures/bioreactors<sup>[11]</sup>, addition to animal feed<sup>[34,35]</sup>,  $\text{CO}_2$  in plant  
425 incubation chambers<sup>[36]</sup> or as  $^{15}\text{N}$  in plant fertilizer, and *in situ* incubations<sup>[10]</sup>. For the Protein-  
426 SIP approach presented here, substrate should be supplied with 1-10% of the total substrate  
427 containing the heavy isotope (label). Please note that this range refers to  $^{13}\text{C}$ , for other elements,  
428 such as N, which make up a smaller portion of atoms in a peptide, a higher amount of label can  
429 be used, as the associated peptide mass shifts are smaller. If the substrate is a small molecule  
430 (e.g. glucose), but contains multiple atoms per molecule of the element to be labeled, ideally  
431 only one of the atoms is labeled (or a small portion of atoms if it is a very large molecule) to  
432 avoid isotope “clumping”, as this can lead to a reduction in sensitivity (Fig. 3). Calis-p can,  
433 however, handle “clumped” data if needed. Similarly, if a complex substrate is used (e.g.  
434 complete plant leaves) ideally the complex substrate should only be partially labeled (e.g. by  
435 growing plants in an atmosphere with 10% of the  $\text{CO}_2$  being labeled) rather than using fully  
436 labeled substrate.

437 Other considerations for the labeling experiments include the number of replicates that  
438 are required, which depends on the biological question of the experiment, if a time course or a  
439 single time point will be sampled, and if a control with unlabeled substrate will be carried out,  
440 which is not needed for Calis-p, but can be helpful in data interpretation. Generally, we  
441 recommend to carry out a feasibility study, if at all possible, to determine the correct amount of  
442 label that works for the study system and time points that need to be sampled. Measurement of  
443 bulk label incorporation using an isotope ratio mass spectrometer can be useful in determining if  
444 an experiment worked prior to starting sample preparation for protein-SIP.

445 The produced samples should be processed with a standard metaproteomic sample  
446 preparation method tuned to the particular sample type. In contrast to the protein-SIF method<sup>[14]</sup>,  
447 which requires calibration for a small isotope offset caused by the instrument, no calibration  
448 reference material needs to be prepared for protein-SIP. The produced peptide mixtures need to  
449 be analyzed by 1D or 2D liquid chromatography (LC) and tandem mass spectrometry (MS/MS)

450 using a high-resolution Orbitrap mass spectrometer with standard metaproteomic LC-MS/MS  
451 approaches (see Methods and e.g. <sup>[37]</sup>). One important consideration for the data acquisition in  
452 the mass spectrometer is the choice of resolution particularly for experiments involving <sup>15</sup>N  
453 labeling (see Suppl. Results and Discussion).

454 The steps for data preparation for Calis-p and the computational steps implemented in  
455 Calis-p are described in detail in the Methods and on the Calis-p software repository website  
456 (<https://sourceforge.net/projects/calis-p/>).



458 **Figure 7:** Protein-SIP and direct Protein-SIF workflow using Calis-p 2.0. The data filtering and  
459 computations illustrated in step (5) all happen in Calis-p in a fully automated fashion. The user has the  
460 ability to set specific parameters when starting the program. Full details on how to operate Calis-p are  
461 provided in the Wiki at <https://sourceforge.net/projects/calis-p/>. Not shown in the figure is that for Protein-  
462 SIF calibration of values with a reference material is needed, for details on this see the supplementary  
463 text and the original Protein-SIF publication<sup>[14]</sup>.

## 464 Discussion

465 The developed Protein-SIP approach provides a means to detect and quantify the incorporation  
466 of stable isotopes from labeled substrates into many individual species in microbial communities  
467 in one LC-MS/MS measurement and with minimal computational cost. Our approach has many  
468 advantages over other SIP approaches and previously developed protein-SIP approaches. First,  
469 the approach allows for high throughput, as compared to most other stable isotope probing  
470 methods, such as DNA/RNA-SIP and nanoSIMS because as little as 2 hours of LC-MS/MS time  
471 will allow to quantify label incorporation for a good number of the more abundant species in a  
472 sample. For example, in bioreactors with 63 species we were consistently able to obtain  
473 sufficient measurement depth to quantify heavy water incorporation in >20 species (Fig. 6). In  
474 contrast, nanoSIMS, for example, only allows for measurement of isotope incorporation into a  
475 limited number of individual cells of very few species (2-3) in this time frame as species  
476 assignment of cells depends on species specific probes. Second, our approach is a departure from  
477 previously developed protein-SIP approaches in that it is highly sensitive and affords a large  
478 dynamic range of three orders of magnitude detecting label incorporation in the range of 0.01-  
479 10% of added label, while previous protein-SIP detection principles require much higher label  
480 amounts to enable detection and usually offer only a dynamic range of one order of  
481 magnitude<sup>[20]</sup>. Similar is true for DNA/RNA-SIP based approaches, which require at least 20%  
482 label for detection<sup>[8]</sup>. The high sensitivity and large dynamic range of our approach brings  
483 numerous advantages, including significant reduction in use of often very expensive isotopically  
484 labeled substrates, the ability to work with much shorter labeling times and simultaneous  
485 detection of label incorporation in slow and fast growing microorganisms. Using shorter  
486 incubation times is possible because incorporation of labels into proteins does not require for  
487 replication to occur, which is the case for DNA-SIP. It is important to note here that the <sup>13</sup>C-label  
488 content of the substrate needs to be kept at 10% or below for our approach to work (higher  
489 percentages can be used for other elements see Box). A short labeling pulse with a substrate with  
490 higher label percentage would generate a heavy peptide population that would be completely  
491 mass shifted away from the unlabeled peptide population and thus become undetectable. Third,  
492 we developed our approach to work with stable isotopes of all elements present in proteins,  
493 which allows tracking of assimilation of a large diversity of simple and complex substrates, as  
494 well as general activity markers such as <sup>2</sup>H and <sup>18</sup>O water. The sensitivity of our approach is  
495 particularly useful when using deuterated water as an indicator to detect changes in activity of  
496 microbial species, because deuterated water in high concentrations is toxic to microorganisms  
497 and does not get incorporated well into proteins<sup>[10]</sup>. The low deuterium amounts needed for our

498 highly sensitive Protein-SIP approach facilitates the use of deuterated water and thus its use as a  
499 general activity marker. That being said, based on our  $^2\text{H}$  and  $^{18}\text{O}$  water results, we would  
500 recommend to use  $^{18}\text{O}$  as the activity marker if compatible with the experimental design. It is  
501 incorporated more effectively leading to higher sensitivity. Fourth, Protein-SIP does not require  
502 isotope based separations of biological material such as the density gradient centrifugation used  
503 for DNA/RNA-SIP. That approach requires large amounts of material and sequencing of  
504 multiple fractions per sample. For this reason, Protein-SIP can be done with very small amounts  
505 of sample with an ideal starting amount of 1 mg or more of wet weight cell mass<sup>[14]</sup>. However,  
506 we have achieved good isotope estimates with as little as 50  $\mu\text{g}$  using Calis-p for stable isotope  
507 fingerprinting<sup>[38]</sup>.

508 Currently, Protein-SIP only allows for labeling with one isotope per sample as changes in  
509 peptide isotope patterns cannot be attributed to specific elements. However, in the future it might  
510 be possible to develop Protein-SIP approaches that allow for parallel measurement of  $^{15}\text{N}$  and  
511  $^{13}\text{C}$  incorporation in a single sample, because added neutron masses for  $^{15}\text{N}$  and  $^{13}\text{C}$  are  
512 sufficiently different from each other - due to differences in nuclear binding energy- to allow for  
513 their separation in ultra-high resolution mass spectrometers (Suppl. Results and Discussion). The  
514 current limitation for generating ultra-high resolution data suitable for separating peptide carbon  
515 and nitrogen isotopes is that higher resolution comes at slower mass spectrometric acquisition  
516 time. Thus, there is a tradeoff between ultra-high resolution data acquisition and obtaining a  
517 large number of MS<sup>2</sup> spectra for peptide identification. Instruments with faster acquisition times  
518 and potentially alternative data acquisition modes such as data-independent acquisition (DIA)  
519 metaproteomics could make dual-label Protein-SIP feasible in the next few years.

## 520 Methods

### 521 Generation of labeled pure culture samples

522 The following steps were followed for single-carbon labeled and six-carbon labeled  $^{13}\text{C}$  glucose  
523 experiments with both *Escherichia coli* K12 (Obtained from Salmonella Genetic Stock Centre at  
524 the University of Calgary, Catalogue # SGSC 268) and *Bacillus subtilis* strain ATCC 6051. M9  
525 and *Bacillus* minimal media were prepared without glucose. For M9 minimal medium we  
526 dissolved  $\text{Na}_2\text{HPO}_4$  (12.8 g),  $\text{KH}_2\text{PO}_4$  (3.0 g),  $\text{NaCl}$  (0.5 g),  $\text{NH}_4\text{Cl}$  (1.0 g) in DI Water (978 ml)  
527 and autoclaved. Once the solution had cooled, we added the following filter-sterilized solutions:  
528 1 M  $\text{MgSO}_4$  (2 ml), 1 M  $\text{CaCl}_2$  (0.1 ml), and 0.5% w/v thiamine (0.1 ml). *Bacillus* minimal  
529 medium (0.062 M  $\text{K}_2\text{HPO}_4$ , 0.044 M  $\text{KH}_2\text{PO}_4$ , 0.015 M  $(\text{NH}_4)_2\text{SO}_4$ , 0.0008 M  $\text{MgSO}_4 \times 7 \text{H}_2\text{O}$ )  
530 was prepared, the pH adjusted to 7 and autoclaved.

531 20% stock solutions of both unlabeled and  $^{13}\text{C}$ -labeled glucose were combined to make a total of  
532 eight glucose mixes with final  $^{13}\text{C}$ -labeling percentages (% w/w) as follows: 0, 0.01, 0.025, 0.1,  
533 0.25, 1, 5, and 10. Please note that the unlabeled glucose contained natural abundances of  $^{13}\text{C}$  of

534 around 1.1% and that the percentage of  $^{13}\text{C}$  from labeled glucose has to be added to this. For  
535 unlabeled glucose we used D-(+)- glucose ( $> 99.5\%$ ) from Sigma Life Science, cat no. G7021  
536 and for labeled glucose we used either D-glucose-U- $^{13}\text{C}$  (99%, Cambridge Isotope Laboratories,  
537 cat no CLM-1396-10) or D-glucose-2- $^{13}\text{C}$  glucose (99%, Aldrich, cat no. 310794). **Cell growth:**  
538 Frozen stock cultures were streaked on LB agar plates and incubated overnight at  $37^\circ\text{C}$ . A single  
539 colony was picked from the plate and grown overnight at  $37^\circ\text{C}$  in liquid media. Nine milliliters  
540 of overnight culture were spun down at 18,000 g for five minutes, the supernatant was discarded  
541 and pellets were washed twice with PBS to remove unlabeled glucose. Pellets were resuspended  
542 in 1 ml PBS. **Labeling:** Ten milliliters of liquid media without glucose were aliquoted into a  
543 total of 24 serum bottles per strain (triplicate bottles for each of the eight  $^{12}\text{C}/^{13}\text{C}$  glucose mixes).  
544 200  $\mu\text{l}$  of the  $^{12}\text{C}/^{13}\text{C}$  mixes and 10  $\mu\text{l}$  of overnight culture were added into the serum bottles.  
545 The bottles were then crimped, the headspace was flushed three times with  $\text{CO}_2$ -free air and  
546 cultures were incubated overnight at  $37^\circ\text{C}$  while shaking at 100 RPM. **Sample processing:**  
547 Serum bottles were depressurized by inserting a sterilized needle into the septum to release air.  
548 Ten milliliters of culture from each bottle were spun down at 18,000 g for five minutes. The  
549 supernatant was discarded and the pellet resuspended in 2 ml of PBS to make two 1 ml aliquots.  
550 50  $\mu\text{l}$  of 1%, 5% and 10%-labeled glucose grown cells were used for cell counts using a  
551 Neubauer counting chamber. Cells were pelleted at 10,000 g for five minutes, the supernatant  
552 was discarded and pellets were flash-frozen in liquid nitrogen before being transferred to  $-80^\circ\text{C}$ .

### 553 **Mock community spike-in experiments**

554 The generation of the mock community (UNEVEN type) is described in Kleiner et al. (2017)<sup>[21]</sup>.  
555 We mixed *E. coli* cells grown in 1, 5 and 10%  $^{13}\text{C}_6$ -labeled glucose containing media into three  
556 replicate samples of this mock community. We mixed the labeled *E. coli* cells in a 1:1 ratio to  
557 unlabeled *E. coli* cells already present in the mock community based on cell counts.

### 558 **Heavy water incubations of a microbial community derived from the human** 559 **intestinal tract**

560 The growth conditions, sample preparation and LC-MS/MS methods for the human intestinal  
561 microbiota grown in bioreactors has been described in Starke et al.<sup>[11]</sup>. Briefly, two bioreactors  
562 were inoculated with 63 bacterial strains (six phyla) isolated from a healthy human fecal sample.  
563 Bioreactors were fed with two custom media formulations representing different diets - high  
564 fiber and a high protein (see table S2 in <sup>[11]</sup>). 2 ml batch cultures were set up using material from  
565 the bioreactors and 1 ml of pre-reduced, double strength medium (high fiber or protein), as well  
566 as 1 ml of unlabeled,  $^{18}\text{O}$  or  $^2\text{H}$  water was added. After a 12 h incubation at  $37^\circ\text{C}$  in an anaerobic  
567 chamber samples were collected by centrifugation. The protein sequence database for  
568 identification of peptides from these samples was generated from the Uniprot reference  
569 proteomes for the species most closely related to the 63 isolates based on the 16S rRNA  
570 information published in Starke et al.<sup>[11]</sup>. When computing  $^{18}\text{O}$  and  $^2\text{H}$  abundances with Calis-p

571 for these samples we corrected for offset, which can be caused by the natural deviation of the <sup>13</sup>C  
572 abundance from the standard value as described in the supplementary methods.

## 573 **Sample preparation and One-Dimensional (1D) LC-MS/MS**

574 Peptide samples for proteomics were prepared as described by Kleiner et al. (2017)<sup>[21]</sup> following  
575 the filter-aided sample preparation protocol described by Wisniewski et al. (2009)<sup>[39]</sup>. Peptide  
576 concentrations were quantified using a Qubit® Protein Assay Kit (Thermo Fisher Scientific).

577 **1D-LC-MS/MS.** Samples were analyzed by 1D-LC-MS/MS as described in Hinzke et al.  
578 (2019)<sup>[37]</sup>. Replicate samples (e.g. replicate 1 at 1%, 5% and 10%) were run consecutively  
579 followed by two wash runs and a blank run to reduce carryover. For 1D-LC-MS/MS, 0.4 µg  
580 (pure culture samples) or 2 µg of peptide (mock community-spike in samples) were loaded onto  
581 a 5 mm, 300 µm i.d. C18 Acclaim PepMap 100 precolumn (Thermo Fisher Scientific) using an  
582 UltiMate 3000 RSLCnano Liquid Chromatograph (Thermo Fisher Scientific). After loading, the  
583 precolumn was switched in line with either a 50 cm × 75 µm (pure culture samples) or a 75 cm ×  
584 75 µm (mock community – spike in samples) analytical EASY-Spray column packed with  
585 PepMap RSLC C<sub>18</sub>, 2 µm material. The analytical column was connected via an Easy-Spray  
586 source to a Q Exactive Plus hybrid quadrupole-Orbitrap mass spectrometer (Thermo Fisher  
587 Scientific). Peptides were separated on the analytical column using 140 (pure culture samples) or  
588 260 (mock community - spike in) min gradients and mass spectra were acquired in the Orbitrap  
589 as described by Petersen et al. (2016). The resolution used on the Q Exactive Plus for MS<sup>1</sup> scans,  
590 which provide the isotope pattern information used by Calis-p, was 70,000.

## 591 **Peptide identification and data preparation for Calis-p**

592 Briefly, the LC-MS/MS data were used as the input for peptide identification using the database  
593 search engine SEQUEST HT implemented in Proteome Discoverer 2.2 (Thermo Scientific).  
594 Note, other standard search engines such as Andromeda implemented in MaxQuant<sup>[40]</sup> can be  
595 used as well. We used experiments specific protein sequence databases for the searches and these  
596 databases have been submitted along with the LC-MS/MS data sets (see Data Availability).  
597 Taxonomic information available for protein sequences in the search database, for example from  
598 metagenomic binning and classification, was indicated as a prefix in the accession number (e.g.  
599 >TAX\_00000) to enable Calis-p to report isotope values for each taxonomic group. The searches  
600 were modified to increase peptide identification rates for higher label amounts using customized  
601 modifications (see Suppl. Results and Discussion). The peptide spectrum matches (PSMs)  
602 produced by the search engine were exported from the search engine either in tabular format or  
603 in the open format mzIdentML and provided to Calis-p together with the mass spectrometry raw  
604 data in the open mzML format. The mzML files were generated from the raw data using  
605 MSConvertGUI via ProteoWizard<sup>[41]</sup> with the following options set: Output format: mzML,  
606 Binary encoding precision: 64-bit, Write index: checked, TPP compatibility: checked, Filter:

607 Peak Picking, Algorithm: Vendor, MS Levels: 1 (The MS/MS scans are not needed for isotope  
608 pattern extraction).

609 Once input files and optional parameters are provided Calis-p extracts isotope patterns for all  
610 identified peptides using a procedure optimized for protein-SIP. The isotope patterns are  
611 extensively filtered for quality and high quality patterns are used for calculation of peptide  
612 isotope content using three different models. The “default” model developed for Protein-SIF, the  
613 “neutron abundance” model, which usually works best for Protein-SIP, and the “clumpy” model  
614 (see Methods). Calis-p automatically provides output files for all three models for taxa, proteins  
615 and peptides in a tabulated format that can subsequently be used in statistical and other data  
616 analysis softwares such as R.

### 617 **SIP computation algorithms and computational improvements to increase** 618 **speed and accuracy of isotopic pattern extraction**

619 As a starting point for estimation of stable isotope composition of isotopically labeled samples,  
620 we augmented the Calis-p software previously developed for estimation of  $^{13}\text{C}$  at natural  
621 abundance<sup>[14]</sup>. For estimating natural  $^{13}\text{C}$  abundance the software uses a model that assumes  
622 random distribution of  $^{13}\text{C}$  atoms in peptides, leading to peptide spectra with predictable isotope  
623 patterns. These isotope patterns are modelled in Calis-p with Fast Fourier Transformations. With  
624 labeled samples a random distribution cannot be expected. Therefore, we used the following  
625 more general equation to infer the number of neutrons from peptide isotope patterns to  
626 implement a “neutron abundance” model:

$$627 \quad \text{Equation 1: } \frac{\sum_{p=0}^n p \cdot I_p}{\sum_{p=0}^n I_p} = \sum_{e=C}^S \sum_{n=1}^4 n \cdot \varphi_{e,n} \cdot a_e$$

628 With, on the left, considering a spectrum of  $n$  peaks,  $p$  is the peak number, and  $I$  is the intensity  
629 of peak  $p$ . On the right, for each isotope,  $e$  is its element [C,H,O,N,S],  $n$  the number of additional  
630 neutrons,  $\varphi$  its abundance (fraction), and  $a$  the number of atoms of the element in the peptide  
631 associated with the spectrum. Table 1 shows the estimates for natural abundances of the isotopes  
632 used in calculations.

633

634 Table 1. Estimates for natural abundances of the isotopes used in calculations based on the  
635 IUPAC Technical Report on the Atomic Weights of the Elements <sup>[42]</sup>.

|         |         |    |    |    |    |
|---------|---------|----|----|----|----|
|         | Isotope |    |    |    |    |
| Element | +0      | +1 | +2 | +3 | +4 |

|   |                 |             |             |   |        |
|---|-----------------|-------------|-------------|---|--------|
| C | 0.9889434148335 | 0.011056585 | 0           | 0 | 0      |
| N | 0.996323567     | 0.003676433 | 0           | 0 | 0      |
| O | 0.997574195     | 0.00038     | 0.002045805 | 0 | 0      |
| H | 0.99988         | 0.00012     | 0           | 0 | 0      |
| S | 0.9493          | 0.0076      | 0.0429      | 0 | 0.0002 |

636 We can rearrange this equation to, for example, calculate the fraction of  $^{13}\text{C}$ , assuming all other  
637 isotopes are at natural abundance, as follows:

638

639 Equation 2: 
$$\varphi_{C,1} = \left( \frac{\sum_{p=0}^n p \cdot I_p}{\sum_{p=0}^n I_p} - \sum_{e=H}^S \sum_{n=1}^4 n \cdot \varphi_{e,n} \cdot a_e \right) \div n_C$$

640

641 The second SIP computation algorithm was implemented in Calis-p as the “clumpy label” model.  
642 When labeling with substrates that contain multiple isotopically labeled atoms, for example fully  
643 labeled  $^{13}\text{C}_{1-6}$  glucose, this can lead to assimilation of clumps of labeled atoms into a single  
644 amino acid. For example, fully labeled glucose will be converted to fully labeled pyruvate,  
645 which, in turn, will be converted to fully labeled alanine, which will be incorporated into protein.  
646 This leads to peptide spectra that display higher-than-expected intensity at a higher isotopic peak  
647 numbers. To estimate the “clumpiness” of heavy isotopes in peptides, we developed the  
648 following procedure: First, only the monoisotopic peak ( $A = +0$ ) and  $A+1$  peaks of the spectrum  
649 are used to estimate the fraction assimilated in clumps of one heavy atom (e.g.  $^{13}\text{C}$ ). Next, the  
650 experimental intensity of the  $A+2$  peak is compared to its expected intensity assuming all label  
651 was assimilated in clumps of one heavy atom. Any additional intensity of the  $A+2$  peak is  
652 assigned to assimilation of clumps of two heavy atoms. This way, all peaks up to  $A+6$  are  
653 inspected. The algorithm assumes the peptides are completely labeled, i.e. labeled to saturation.  
654 Usually, stable isotope probing experiments do not proceed that long, but doing so would enable  
655 determination of the number of labeled atoms in the substrate assimilated by each species via this  
656 procedure.

657 In typical proteomics data, tens to hundreds of MS1 spectra are collected for each  
658 detected peptide, at different elution times and mass over charge ratios. MS1 spectra can be  
659 crowded, especially for samples from more complex microbial communities. Unfortunately,  
660 overlap between spectra associated with different peptides can lead to overestimation of labeling.  
661 We have added new filtering routines, which remove such compromised spectra in two steps.  
662 First, any spectra with uneven spacing between peaks (which could indicate overlap with another

663 spectrum) are discarded. Next, remaining spectra are filtered out by unsupervised Markov  
664 clustering of all remaining spectra associated with a peptide<sup>[43]</sup>. The premise of this filtering  
665 approach is that clean spectra will be similar to each other, while spectra affected by noise are  
666 likely to be more different from each other. After filtering, all remaining spectra are truncated to  
667 the most common number of peaks, and spectra with fewer peaks are discarded. Spectra are then  
668 normalized to a total intensity of  $I$ , and an average (weighed by total spectral intensity)  
669 normalized spectrum was calculated for each peptide. The averages are weighed by intensity  
670 because high intensity spectra are more accurate and less noisy.

671 The normalized spectrum of each peptide is used to estimate the peptide's isotopic  
672 composition using the original "Fast Fourier Transformations" based model (also called  
673 "default"), as well as the new "neutron abundance" (Equation 1) and "clumpy label" models..  
674 For each species and protein in the sample, two center statistics are calculated based on all  
675 peptides associated with a species or protein: the median and the intensity-weighted average. The  
676 supplementary methods provide a detailed discussion of which center statistic to use when.

## 677 **Generating an additional label incorporation measure and Increasing** 678 **peptide identification by using mass shift modifications in peptide** 679 **identification searches**

680 In addition to estimates based on MS1 spectra, we also estimated the degree of labelling  
681 based on the output of the search engine used for peptide identification. For this, we defined six  
682 custom post-translational modifications in the search engine that enable the dynamic addition of  
683 1-6 neutrons to a peptide during the search. We tested multiple implementations of these  
684 dynamic modifications (Figs. 2 & S2, Suppl. Results & Discussion). Details on the  
685 implementation of the modifications in a search engine can be found in the Calis-p software  
686 documentation (<https://sourceforge.net/p/calisp/wiki/PSM%20files/>).

## 687 **Other improvements of the Calis-p software**

688 In addition to expanded functionality with regard to filtering of peptides and labeling, the  
689 software was also improved in many other ways: It now computes isotopic content of peptides  
690 with post-translational modifications and peptides containing sulfur peptides. It finds many more  
691 MS1 spectra for each peptide by searching for spectra at additional mass to charge ratios. Next to  
692 tab-delimited text PSM files exported from Proteome Discoverer, it now also parses open source  
693 mzidentml XML files (<http://www.psidev.info/mzidentml>). Finally, code efficiency  
694 improvements and implementation of multi-threading led to much faster computation, requiring  
695 less than one minute to process all spectra recorded during a 2 h run on a QExactive Plus  
696 Orbitrap mass spectrometer, using 10 threads. Source code and more details about algorithms  
697 and procedures can be found at <http://sourceforge.net/projects/calisp/>.

## 698 Data and software availability

699 The Calis-p (version 2.0) was implemented in Java and is freely available for download,  
700 use and modification at <http://sourceforge.net/projects/calis-p/>. The MS proteomics data and the  
701 protein sequence databases have been deposited to the ProteomeXchange Consortium <sup>[44]</sup> via the  
702 PRIDE partner repository with the following dataset identifiers:

703 *B. subtilis* and *E. coli* grown in minimal medium with fully labeled <sup>13</sup>C<sub>1-6</sub>-glucose at  
704 different concentrations PXD023693 [Reviewer Access at: <https://www.ebi.ac.uk/pride/login>  
705 User: [reviewer\\_pxd023693@ebi.ac.uk](mailto:reviewer_pxd023693@ebi.ac.uk) Password: 0AyI3dGY], *B. subtilis* and *E. coli* grown in  
706 minimal medium with singly labeled <sup>13</sup>C<sub>2</sub>-glucose at different concentrations PXD024285  
707 [Reviewer Access at: <https://www.ebi.ac.uk/pride/login> User: [reviewer\\_pxd024285@ebi.ac.uk](mailto:reviewer_pxd024285@ebi.ac.uk)  
708 Password: 0oSaTgAW], labeled *E. coli* spiked into the mock community PXD024174  
709 [Reviewer Access at: <https://www.ebi.ac.uk/pride/login> User: [reviewer\\_pxd024174@ebi.ac.uk](mailto:reviewer_pxd024174@ebi.ac.uk)  
710 Password: axKUZrEV], mixing of labeled and unlabeled *E. coli* PXD024287 [Reviewer Access  
711 at: <https://www.ebi.ac.uk/pride/login> User: [reviewer\\_pxd024287@ebi.ac.uk](mailto:reviewer_pxd024287@ebi.ac.uk) Password:  
712 VmwP04XB], *E. coli* labeled to saturation with 2.5% <sup>15</sup>N ammonium PXD024288 [Reviewer  
713 Access at: <https://www.ebi.ac.uk/pride/login> User: [reviewer\\_pxd024288@ebi.ac.uk](mailto:reviewer_pxd024288@ebi.ac.uk) Password:  
714 oQcd2WjH], and the human microbiota derived microbial community from Starke et al. <sup>[11]</sup>  
715 grown with heavy water and different diets PXD024291 [Reviewer Access at:  
716 <https://www.ebi.ac.uk/pride/login> User: [reviewer\\_pxd024291@ebi.ac.uk](mailto:reviewer_pxd024291@ebi.ac.uk) Password: GHbI87wI].

717 The mock community data without labeled *E. coli* spike-in was previously published <sup>[21]</sup>  
718 and we retrieved files Run4\_U2\_4600ng.msf and Run5\_U2\_4600ng.msf from PRIDE Project  
719 PXD006118.

## 720 Author contributions

721 M.K. and M.S. designed research; M.K., A.K., J.M., and M.S. performed research; M.K., A.K.,  
722 M.J., Y.L. and M.S. analyzed data; and M.K. and M.S. wrote the paper with support from all co-  
723 authors.

## 724 Acknowledgements

725 We thank Abigail Korenek for help creating the protein sequence database for the heavy water  
726 dataset, Nico Jehmlich and Robert Starke for providing the raw data for the heavy water dataset,  
727 and J. Alfredo Blakely-Ruiz for comments on the manuscript.

728 This work was supported by USDA National Institute of Food and Agriculture Hatch project  
729 1014212 (MK), by the National Institute Of General Medical Sciences of the National Institutes  
730 of Health under Award Number R35GM138362 (MK), the U.S. National Science Foundation

731 grant OIA #1934844, the Novo Nordisk Foundation INTERACT project under Grant number  
732 NNF19SA0059360 (MK), the Foundation for Food and Agriculture Research Grant ID: 593607  
733 (MK), the Canada Foundation for Innovation (#32181, MS), the Natural Sciences and  
734 Engineering Research Council (NSERC), the Canada First Research Excellence Fund (CFREF),  
735 the Government of Alberta, and the University of Calgary.

## 736 Competing interests

737 The authors have no competing interests to declare.

## 738 References

- 739 1. Kleiner M, Wentrup C, Holler T, Lavik G, Harder J, Lott C, et al. Use of carbon monoxide  
740 and hydrogen by a bacteria–animal symbiosis from seagrass sediments. *Environ Microbiol*  
741 2015;17(12):5023–35.
- 742 2. Mayali X. NanoSIMS: Microscale Quantification of Biogeochemical Activity with Large-  
743 Scale Impacts. *Annu Rev Mar Sci* 2020;12(1):449–67.
- 744 3. Berry D, Loy A. Stable-Isotope Probing of Human and Animal Microbiome Function.  
745 *Trends Microbiol* 2018;26(12):999–1007.
- 746 4. Kong Y, Kuzyakov Y, Ruan Y, Zhang J, Wang T, Wang M, et al. DNA Stable-Isotope  
747 Probing Delineates Carbon Flows from Rice Residues into Soil Microbial Communities  
748 Depending on Fertilization. *Appl Environ Microbiol* [Internet] 2020 [cited 2021 Mar  
749 4];86(7). Available from: <https://aem.asm.org/content/86/7/e02151-19>
- 750 5. Pett-Ridge J, Firestone MK. Using stable isotopes to explore root-microbe-mineral  
751 interactions in soil. *Rhizosphere* 2017;3:244–53.
- 752 6. Hatzenpichler R, Scheller S, Tavormina PL, Babin BM, Tirrell DA, Orphan VJ. In situ  
753 visualization of newly synthesized proteins in environmental microbes using amino acid  
754 tagging and click chemistry. *Environ Microbiol* 2014;16(8):2568–90.
- 755 7. Hatzenpichler R, Krukenberg V, Spietz RL, Jay ZJ. Next-generation physiology approaches  
756 to study microbiome function at single cell level. *Nat Rev Microbiol* 2020;18(4):241–56.
- 757 8. Radajewski S, Ineson P, Parekh NR, Murrell JC. Stable-isotope probing as a tool in  
758 microbial ecology. *Nature* 2000;403(6770):646–9.
- 759 9. Jehmlich N, Vogt C, Lünsmann V, Richnow HH, von Bergen M. Protein-SIP in  
760 environmental studies. *Curr Opin Biotechnol* 2016;41:26–33.
- 761 10. Justice NB, Li Z, Wang Y, Spaulding SE, Mosier AC, Hettich RL, et al. 15N- and 2H  
762 proteomic stable isotope probing links nitrogen flow to archaeal heterotrophic activity.  
763 *Environ Microbiol* 2014;16(10):3224–37.

- 764 11. Starke R, Oliphant K, Jehmlich N, Schäpe SS, Sachsenberg T, Kohlbacher O, et al. Tracing  
765 incorporation of heavy water into proteins for species-specific metabolic activity in  
766 complex communities. *J Proteomics* 2020;222:103791.
- 767 12. Eichorst SA, Strasser F, Woyke T, Schintlmeister A, Wagner M, Woebken D.  
768 Advancements in the application of NanoSIMS and Raman microspectroscopy to  
769 investigate the activity of microbial cells in soils. *FEMS Microbiol Ecol* [Internet] 2015  
770 [cited 2021 Mar 8];91(fiv106). Available from: <https://doi.org/10.1093/femsec/fiv106>
- 771 13. Musat N, Musat F, Weber PK, Pett-Ridge J. Tracking microbial interactions with  
772 NanoSIMS. *Curr Opin Biotechnol* 2016;41:114–21.
- 773 14. Kleiner M, Dong X, Hinzke T, Wippler J, Thorson E, Mayer B, et al. Metaproteomics  
774 method to determine carbon sources and assimilation pathways of species in microbial  
775 communities. *Proc Natl Acad Sci U S A* 2018;115(24):E5576–84.
- 776 15. Mann M. Fifteen Years of Stable Isotope Labeling by Amino Acids in Cell Culture  
777 (SILAC) [Internet]. In: Warscheid B, editor. *Stable Isotope Labeling by Amino Acids in*  
778 *Cell Culture (SILAC): Methods and Protocols*. New York, NY: Springer; 2014 [cited 2020  
779 Nov 12]. page 1–7. Available from: [https://doi.org/10.1007/978-1-4939-1142-4\\_1](https://doi.org/10.1007/978-1-4939-1142-4_1)
- 780 16. Kleiner M. Metaproteomics: Much More than Measuring Gene Expression in Microbial  
781 Communities. *mSystems* 2019;4(3):e00115-19.
- 782 17. Pan C, Fischer CR, Hyatt D, Bowen BP, Hettich RL, Banfield JF. Quantitative tracking of  
783 isotope flows in proteomes of microbial communities. *Mol Cell Proteomics* 2011;10(4).
- 784 18. Marlow JJ, Skennerton CT, Li Z, Chourey K, Hettich RL, Pan C, et al. Proteomic Stable  
785 Isotope Probing Reveals Biosynthesis Dynamics of Slow Growing Methane Based  
786 Microbial Communities. *Front Microbiol* [Internet] 2016 [cited 2019 Sep 26];7. Available  
787 from: <https://www.frontiersin.org/articles/10.3389/fmicb.2016.00563/full>
- 788 19. Sachsenberg T, Herbst F-A, Taubert M, Kermer R, Jehmlich N, von Bergen M, et al.  
789 MetaProSIP: Automated Inference of Stable Isotope Incorporation Rates in Proteins for  
790 Functional Metaproteomics. *J Proteome Res* 2015;14(2):619–27.
- 791 20. Starke R. Quantification of the necessary labelling input in protein stable isotope probing.  
792 *bioRxiv* 2020;2020.06.02.129254.
- 793 21. Kleiner M, Thorson E, Sharp CE, Dong X, Liu D, Li C, et al. Assessing species biomass  
794 contributions in microbial communities via metaproteomics. *Nat Commun* 2017;2017:1558.
- 795 22. Berry D, Mader E, Lee TK, Woebken D, Wang Y, Zhu D, et al. Tracking heavy water  
796 (D<sub>2</sub>O) incorporation for identifying and sorting active microbial cells. *Proc Natl Acad Sci*  
797 2015;112(2):E194–203.
- 798 23. Hayes JM. Fractionation of carbon and hydrogen isotopes in biosynthetic processes. *Rev*  
799 *Mineral Geochem* 2001;43(1):225–77.
- 800 24. Englander SW, Sosnick TR, Englander JJ, Mayne L. Mechanisms and uses of hydrogen

- 801 exchange. *Curr Opin Struct Biol* 1996;6(1):18–23.
- 802 25. Lovett S. Effect of Deuterium on Starving Bacteria. *Nature* 1964;203(4943):429–30.
- 803 26. Schnölzer M, Jedrzejewski P, Lehmann WD. Protease-catalyzed incorporation of <sup>18</sup>O into  
804 peptide fragments and its application for protein sequencing by electrospray and matrix-  
805 assisted laser desorption/ionization mass spectrometry. *ELECTROPHORESIS*  
806 1996;17(5):945–53.
- 807 27. Reese AT, Pereira FC, Schintlmeister A, Berry D, Wagner M, Hale LP, et al. Microbial  
808 nitrogen limitation in the mammalian large intestine. *Nat Microbiol* 2018;3(12):1441.
- 809 28. Holmes AJ, Chew YV, Colakoglu F, Cliff JB, Klaassens E, Read MN, et al. Diet-  
810 Microbiome Interactions in Health Are Controlled by Intestinal Nitrogen Source  
811 Constraints. *Cell Metab* 2017;25(1):140–51.
- 812 29. Chijiwa R, Hosokawa M, Kogawa M, Nishikawa Y, Ide K, Sakanashi C, et al. Single-cell  
813 genomics of uncultured bacteria reveals dietary fiber responders in the mouse gut  
814 microbiota. *Microbiome* 2020;8(1):5.
- 815 30. Patnode ML, Beller ZW, Han ND, Cheng J, Peters SL, Terrapon N, et al. Interspecies  
816 Competition Impacts Targeted Manipulation of Human Gut Bacteria by Fiber-Derived  
817 Glycans. *Cell* 2019;179(1):59-73.e13.
- 818 31. Desai MS, Seekatz AM, Koropatkin NM, Kamada N, Hickey CA, Wolter M, et al. A  
819 dietary fiber-deprived gut microbiota degrades the colonic mucus barrier and enhances  
820 pathogen susceptibility. *Cell* 2016;167(5):1339-1353.e21.
- 821 32. Sanders ME, Merenstein DJ, Reid G, Gibson GR, Rastall RA. Probiotics and prebiotics in  
822 intestinal health and disease: from biology to the clinic. *Nat Rev Gastroenterol Hepatol*  
823 2019;16(10):605–16.
- 824 33. Poeker SA, Geirnaert A, Berchtold L, Greppi A, Krych L, Steinert RE, et al. Understanding  
825 the prebiotic potential of different dietary fibers using an in vitro continuous adult  
826 fermentation model (PolyFermS). *Sci Rep* 2018;8(1):4318.
- 827 34. Smyth P, Zhang X, Ning Z, Mayne J, Moore JI, Walker K, et al. Studying the Temporal  
828 Dynamics of the Gut Microbiota Using Metabolic Stable Isotope Labeling and  
829 Metaproteomics. *Anal Chem* [Internet] 2020 [cited 2021 Mar 17]; Available from:  
830 <https://pubs.acs.org/doi/pdf/10.1021/acs.analchem.0c02070>
- 831 35. Mayers MD, Moon C, Stupp GS, Su AI, Wolan DW. Quantitative metaproteomics and  
832 activity-based probe enrichment reveals significant alterations in protein expression from a  
833 mouse model of inflammatory bowel disease. *J Proteome Res* 2017;16(2):1014–26.
- 834 36. Li Z, Yao Q, Guo X, Crits-Christoph A, Mayes MA, Iv WJH, et al. Genome-Resolved  
835 Proteomic Stable Isotope Probing of Soil Microbial Communities Using <sup>13</sup>CO<sub>2</sub> and <sup>13</sup>C-  
836 Methanol. *Front Microbiol* 2019;10:2706.
- 837 37. Hinzke T, Kouris A, Hughes R-A, Strous M, Kleiner M. More is not always better:

- 838 Evaluation of 1D and 2D-LC-MS/MS methods for metaproteomics. *Front Microbiol*  
839 2019;10(238).
- 840 38. Seah BKB, Antony CP, Huettel B, Zarzycki J, Borzyskowski LS von, Erb TJ, et al. Sulfur-  
841 Oxidizing Symbionts without Canonical Genes for Autotrophic CO<sub>2</sub> Fixation. *mBio*  
842 2019;10(3):e01112-19.
- 843 39. Wiśniewski JR, Zougman A, Nagaraj N, Mann M. Universal sample preparation method for  
844 proteome analysis. *Nat Methods* 2009;6(5):359–62.
- 845 40. Cox J, Neuhauser N, Michalski A, Scheltema RA, Olsen JV, Mann M. Andromeda: a  
846 peptide search engine integrated into the MaxQuant environment. *J Proteome Res* 2011;10.
- 847 41. Chambers MC, Maclean B, Burke R, Amodei D, Ruderman DL, Neumann S, et al. A cross-  
848 platform toolkit for mass spectrometry and proteomics. *Nat Biotechnol* 2012;30:918–20.
- 849 42. Laeter JR de, Böhlke JK, Bièvre PD, Hidaka H, Peiser HS, Rosman KJR, et al. Atomic  
850 weights of the elements. Review 2000 (IUPAC Technical Report). *Pure Appl Chem*  
851 2003;75(6):683–800.
- 852 43. Enright AJ, Van Dongen S, Ouzounis CA. An efficient algorithm for large-scale detection  
853 of protein families. *Nucleic Acids Res* 2002;30(7):1575–84.
- 854 44. Vizcaino JA, Deutsch EW, Wang R, Csordas A, Reisinger F, Rios D, et al.  
855 ProteomeXchange provides globally coordinated proteomics data submission and  
856 dissemination. *Nat Biotechnol* 2014;32(3):223–6.
- 857
- 858
- 859
